# Supplementary material
Source: publisher figshare collection journal article supplement (https://acs.figshare.com/ndownloader/files/3890266)
Supplement: Supplementary file 1 [file 3890266]

# Supporting Information

## Enhanced glyphosate removal by montmorillonite in the presence of Fe(III)

*Zhong Ren<sup>a,b</sup>, Yuanhua Dong<sup>a,\*</sup>, Yun Liu<sup>a,\*</sup>*

<sup>a</sup>Key Laboratory of Soil Environment and Pollution Remediation, Institute of Soil  
Science, Chinese Academy of Sciences, Nanjing 210008, PR China

<sup>b</sup>Graduate University of Chinese Academy of Sciences, 100049 Beijing, China

\* Corresponding author. Tel.: +86 25 86881317; +86 25 86881370; fax: +86 25  
86881000. E-mail address: yhdong@issas.ac.cn (Yuanhua Dong); yliu@issas.ac.cn (Yun  
Liu).

Table S1. Main chemical compositions of MT.

| Na <sub>2</sub> O | MgO    | Al <sub>2</sub> O <sub>3</sub> | SiO <sub>2</sub> | K <sub>2</sub> O | CaO    | Fe <sub>2</sub> O <sub>3</sub> |
|-------------------|--------|--------------------------------|------------------|------------------|--------|--------------------------------|
| 0.09 %            | 5.24 % | 16.64 %                        | 58.19 %          | 0.10 %           | 2.83 % | 4.29 %                         |

Table S2. Deprotonation constants of PMG in Na(Cl) ionic medium ( $T = 25^{\circ}\text{C}$ )

| Reaction                                | Log10 $\beta$ |             |             |
|-----------------------------------------|---------------|-------------|-------------|
|                                         | I = 0 M       | I = 0.1 M   | I = 0.6 M   |
| H3L = H2L <sup>-</sup> +H <sup>+</sup>  | -2.44         | -2.25±0.006 | -2.17±0.01  |
| H3L = HL <sup>2-</sup> +2H <sup>+</sup> | -8.33         | -7.70±0.01  | -7.39±0.01  |
| H3L = L <sup>3-</sup> +3H <sup>+</sup>  | -19.14        | -17.61±0.03 | -17.35±0.05 |

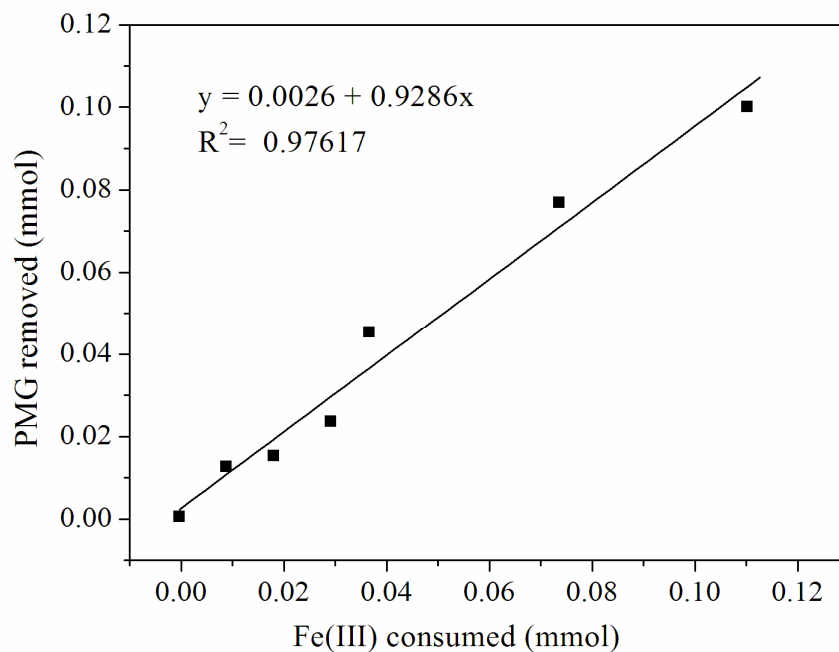

Figure S1. Linear fit of amount PMG removed versus consumed Fe(III) added.

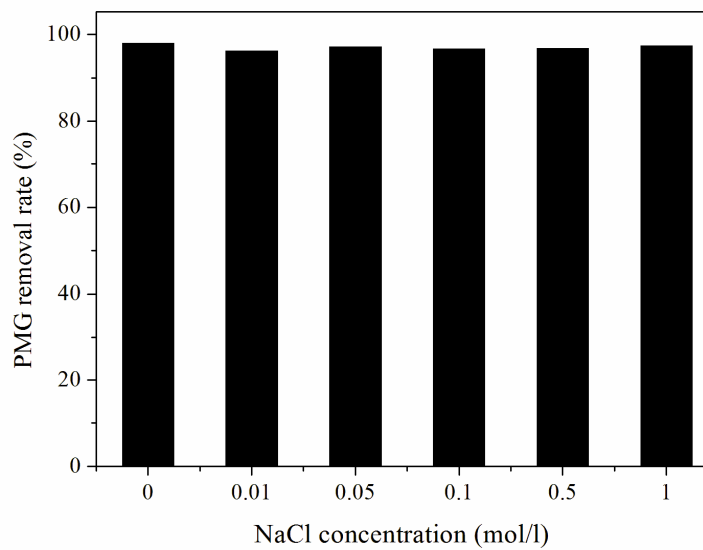

Figure S2. Effect of ion strength on removal of PMG by MT.

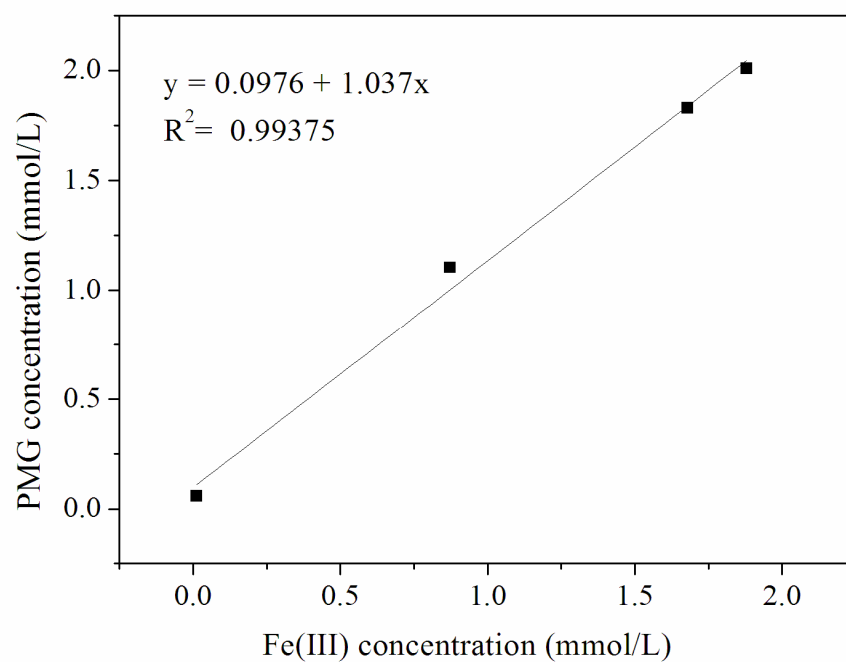

Figure S3. Relationship between PMG and Fe(III) concentration.

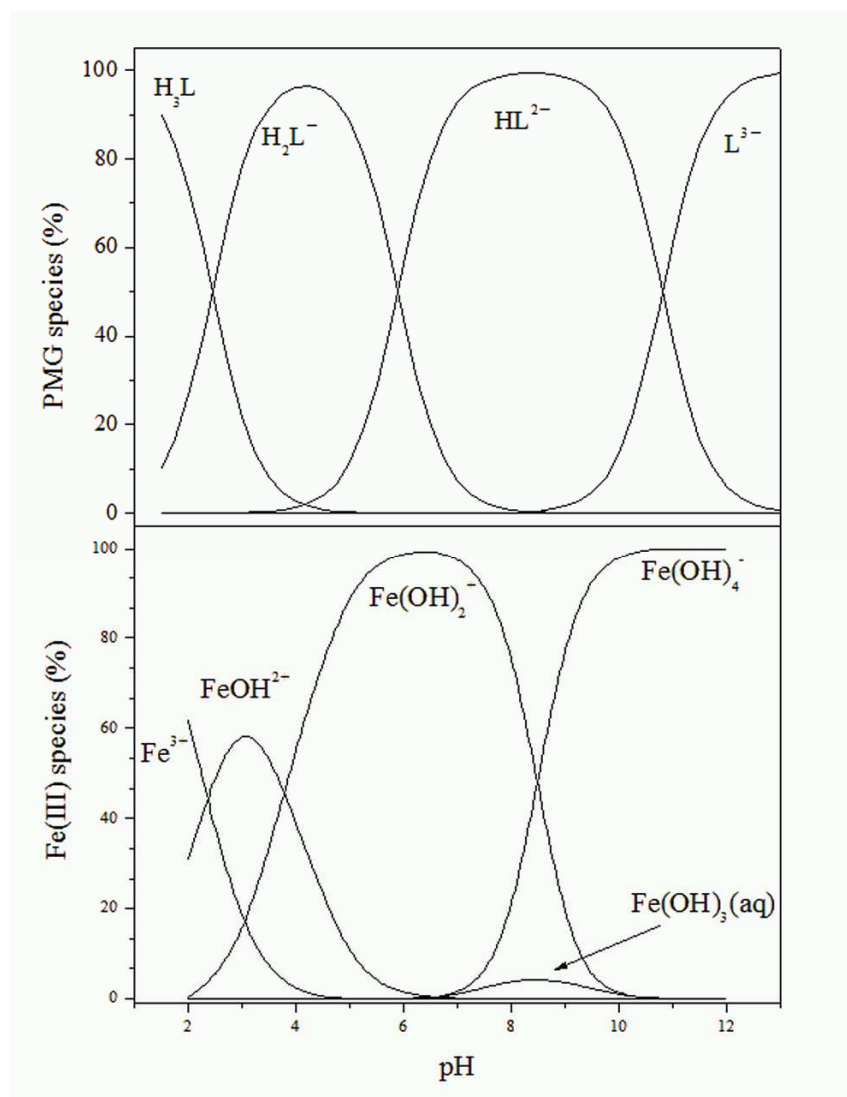

Figure S4. Speciation of Fe(III) and PMG in aqueous solution.
